# Supplementary material
Source: Springer Nature journal article supplement (https://www.springermedizin.de/resource/supplementary/12888_2012_1017_MOESM6_ESM.pdf/9479626)

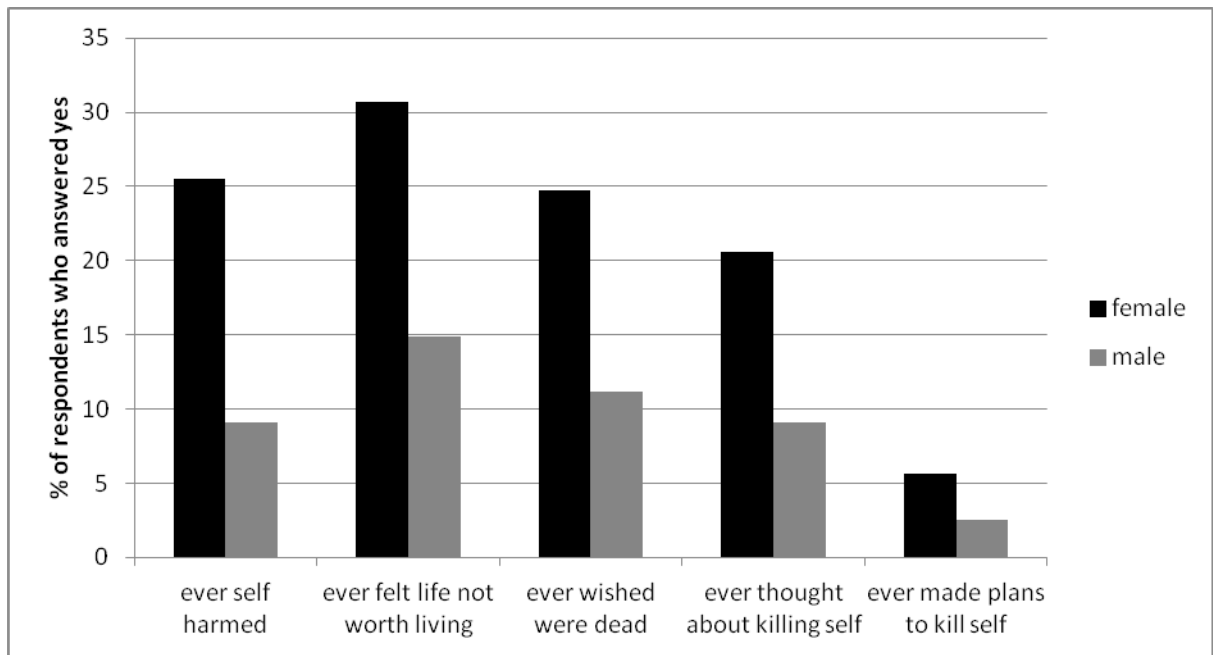

Supplement: MOESM6 [file 9479626]
